# Supplementary material
Source: PubMed Central journal article supplement (PMC8577993)
Supplement: mmc1.pdf [file mmc1.pdf]

**Supplemental information**

**Identification of a therapeutic interfering  
particle—A single-dose SARS-CoV-2 antiviral  
intervention with a high barrier to resistance**

**Sonali Chaturvedi, Gustavo Vasen, Michael Pablo, Xinyue Chen, Nathan Beutler, Arjun Kumar, Elizabeth Tanner, Sylvia Illouz, Donna Rahgoshay, John Burnett, Leo Holguin, Pei-Yi Chen, Blaise Ndjamen, Melanie Ott, Robert Rodick, Thomas Rogers, Davey M. Smith, and Leor S. Weinberger**

**TABLE S1: List and sequences of oligonucleotides used in the study. Related to STAR methods**

|    |                                  |                                                                                                                                                                                                                                                                                                               |
|----|----------------------------------|---------------------------------------------------------------------------------------------------------------------------------------------------------------------------------------------------------------------------------------------------------------------------------------------------------------|
| 1  | N gene qpcr                      | fw: aaatttggggaccaggaac<br>rev: tggcacctgttaggtcaac                                                                                                                                                                                                                                                           |
| 2  | E gene qpcr                      | fw: acaggtacgttaatagttaatagcg<br>rev: atattgcagcagtagcacac                                                                                                                                                                                                                                                    |
| 3  | NSP 14 qpcr                      | fw: tggggytttacrggtaacct<br>rev: aacrcgcttaacaaagcactc                                                                                                                                                                                                                                                        |
| 4  | mCherry qpcr                     | fw: gaacggccacgagttcgaga<br>rev: cttggagccgtacatgaactgagg                                                                                                                                                                                                                                                     |
| 5  | Luciferase qpcr                  | fw: ttatgccggtgttggcgcg<br>rev: ttttgaaaacaacactacggtagct                                                                                                                                                                                                                                                     |
| 6  | TIP                              | t7 fw: taatacactcactataggattaaagtt<br>rev: ttttttttttttttgcattctcctaagaagc                                                                                                                                                                                                                                    |
| 7  | mCherry                          | t7fw:taatacactcactataatggtgagcaaggcgaggag<br>rev: ttactgtacagctcgtccatgccgc                                                                                                                                                                                                                                   |
| 8  | ORF1a internal rev               | tggtgcaagtagaactcgt                                                                                                                                                                                                                                                                                           |
| 9  | Luciferase                       | t7fw:taatacactcactataggatggaagacgcaaaaacata<br>rev:ttagggggggggaggagcctcctgcaggftaaccttactcagtttggactt                                                                                                                                                                                                        |
| 10 | GAPDH qpcr                       | fw: ttcgacagtcagcccatctt<br>rev: caggcgccaatacaccataa                                                                                                                                                                                                                                                         |
| 12 | IFNL1 qpcr                       | fw: cgccttggaaagagtcactca<br>rev: gaagccttaggtccaattc                                                                                                                                                                                                                                                         |
| 13 | IL6 qpcr                         | fw:aacctgaacctccaagatgg<br>rev:tctggcttgcctcactact                                                                                                                                                                                                                                                            |
| 14 | TNF qpcr                         | fw:atgagcacggaaagcatgatcc<br>rev:gagggctgaatagagaggggc                                                                                                                                                                                                                                                        |
| 15 | CCL5 qpcr                        | fw: agtctccgtgctgccctcg<br>rev:ggagcacttgcactggtgtg                                                                                                                                                                                                                                                           |
| 16 | CCL2 qpcr                        | fw: acctccagcatgaaagtctc<br>rev: aagtgacggggcattgat                                                                                                                                                                                                                                                           |
| 17 | ISG20 qpcr                       | fw: tgaggagagatcaccgatt<br>rev: tagcggctcatgtcctcttt                                                                                                                                                                                                                                                          |
| 18 | ISG54 qpcr                       | fw: ggtctttcagcgttattggg<br>rev: tgccgtaggtcctctcca                                                                                                                                                                                                                                                           |
| 19 | CXCL10 qpcr                      | fw: gtggcattcaaggaatacctc<br>rev: gccttagattctggattcagca                                                                                                                                                                                                                                                      |
| 20 | M with 3 stopcodons control RNA  | t7 m: fw:taatacactcactataggatggcagattcctaataataaacggtactattaccgttg<br>rev with ires overlap: gttagggggggggagggattactgtacaagcaagcaatatt<br>ires fw with s overlap: aatgaaaatggaaccattacagatccccccccccctaagc<br>m overlap: atattgcttgcctgtacagtaatecctccccccccccctaac<br>mcherry rev: ttactgtacagctcgtccatgccgc |
| 21 | S with 3 stop codons control RNA | fw:taatacactcactataggatggtttgttttaataaactggtttatgccactagt<br>s rev with ires overlap: cgtagggggggggagggatctgtaatggttccatttca<br>ires fw with aatgaaaatggaaccattacagatccccccccccctaagc<br>mcherry rev: ttactgtacagctcgtccatgccgc                                                                               |
| 22 | 5' UTR Control RNA               | t7 fw: taatacactcactataggattaaagtt<br>mcherry rev: ttactgtacagctcgtccatgccgc                                                                                                                                                                                                                                  |
| 23 | 3' UTR Control RNA               | fw: taatacactcactataggctccccccccccctaac<br>rev: ttttttttttttttgcattctcctaagaagc                                                                                                                                                                                                                               |
| 24 | b-actin hamster qpcr             | fw: actgcccatcctcttct<br>rev: tcgttgccaatggtgatgac                                                                                                                                                                                                                                                            |
| 25 | TIP1 sequence                    | attaaaggttataccttcccagtaacaaccaacacttctgactctttagatctgttctctaaacgaactttaaatctgtgtggctg<br>tcactcggctcatgcttagtcactcacgcagtataaataactaacttctgcttgcaggacacgagtaactcgtctatctctgc                                                                                                                                 |

|    |               |                                                                                                                                                                                                                                                                                                                                                                                                                                                                                                                                                                                                                                                                                                                                                                                                                                                                                                                                                                                                                                                                                                                                                                                                                                                                                                                                                                                                                                                                                                                                                                                                                                                                                                                                                                                                                                                                                                                                                                                                                                                                                                                                                                                                                                                                                                                                                                                                                                                                                                                                                                                                                                                                                                                                                                                                                                                                                                                                                                                                                                                                                                                                                                                                                                                                                                                                                                                                                                                                                                                                                                                                                                                                                                                          |
|----|---------------|--------------------------------------------------------------------------------------------------------------------------------------------------------------------------------------------------------------------------------------------------------------------------------------------------------------------------------------------------------------------------------------------------------------------------------------------------------------------------------------------------------------------------------------------------------------------------------------------------------------------------------------------------------------------------------------------------------------------------------------------------------------------------------------------------------------------------------------------------------------------------------------------------------------------------------------------------------------------------------------------------------------------------------------------------------------------------------------------------------------------------------------------------------------------------------------------------------------------------------------------------------------------------------------------------------------------------------------------------------------------------------------------------------------------------------------------------------------------------------------------------------------------------------------------------------------------------------------------------------------------------------------------------------------------------------------------------------------------------------------------------------------------------------------------------------------------------------------------------------------------------------------------------------------------------------------------------------------------------------------------------------------------------------------------------------------------------------------------------------------------------------------------------------------------------------------------------------------------------------------------------------------------------------------------------------------------------------------------------------------------------------------------------------------------------------------------------------------------------------------------------------------------------------------------------------------------------------------------------------------------------------------------------------------------------------------------------------------------------------------------------------------------------------------------------------------------------------------------------------------------------------------------------------------------------------------------------------------------------------------------------------------------------------------------------------------------------------------------------------------------------------------------------------------------------------------------------------------------------------------------------------------------------------------------------------------------------------------------------------------------------------------------------------------------------------------------------------------------------------------------------------------------------------------------------------------------------------------------------------------------------------------------------------------------------------------------------------------------------|
|    |               | <p>aggctgcttacggttctcctgctggtgacccgatcatcagcacatctaggttctcctgggtgaccgaaaggtaaatggagagc<br/> ctgtccctggttcaacgagaaacacacgtccaactcagttgctgttttacaggttcgacgtgctcgtacgtggttggagact<br/> ccgtggaggaggctttatcagaggcagctcaactcttaaagatggcacttggccttagtagaagttgaaaaagggcttttgcctccc<br/> ccccccccctaacgttactgcccgaagccgcttgaataagccggtgctgcttctctatattttccaccatattgctgtttt<br/> ggcaatgtgaggcccgaaacctggcctgtcttctgacgagcattctaggggttctccctctcgcgaaggaatgcaaggctc<br/> tgtgaatgtcgtgaaggagcagttcctctggaagcttctgaagcaaacacgtctgtagcgacccttggcagcgaggcaacc<br/> cccacctggcgacaggtgcttctgcccgaagccacgtgataagatacacctgcaagggcgacacccccagctgcccactgt<br/> gtgagttggatggtggaagagtcacatgctctcctcaagcgtattcaacaagggctgagggatgccagaaggtaccctatt<br/> gtatgggatctgctgggctcgttacacatgctttacatgtttagtcgaggttaaaaaaacgttagccccgaaccacggg<br/> gacgtggtttcttgaagaacacatgataatgtgtgagcaagggcgagggagataaacgtgcatcaaggatgctatgctgc<br/> ttcaaggtgcacatggaggtcctgtgaacggccacgagttcgagatcgagggcgagggcgagggcccccctacgagggcac<br/> ccagaccgcaagctgaaggtgaccaaggtggccccctgcccctgctgggacatcctgtcccctcagttcatgacgctccaa<br/> ggcctacgtgaagcaccgcccgcacatccccgactacttgaagctgctctcccagggcctcaaggtgagcgcgtgatgaact<br/> cggagcagggcgctggtgacgtgacccagcctcctcctgagggcaggttcatctcaaggtgagcgcgtgatgaact<br/> caacttcccctccgacggccccgtaatgcagaagaagacatgggctgggagggcctcctccgagcggatgacccccgagggc<br/> gcccgtgaagggcgagatcaagcagagcgtgaagctgaaggacggcggcactacgacgtgaggtcaagaccactacaagc<br/> caagaagcccgtgacgtgcccggcgctacaacgtcaacatcaagttgacatcaccccaaacgaggtacacacatcgtgg<br/> aacgtacgaacgcccggggccgactccaccggcgcatgagcagctgacaagtaagaccacacaagcgagatgggc<br/> tatataaacgtttctgttccgtttacgatatagtctactctgtgcaaatgaattctgtaactacatagcaagaatgtagttaa<br/> cttaactcacaatagcaactttaaactcaggtgtaacatgaggaggtgaaagagccaccacatttaccggagggcagcgggag<br/> acgatgaggtgacagcaaatgctagggagagctgcttatatggaaagccctaatgtgtaaaatatttagtagtgcctatccc<br/> atgtatttaataagcttcttaggagaatgacaaaaaaaaaaaaaaaaaaaaaaaaaaaaaaaaaaaaaaaa</p>                                                                                                                                                                                                                                                                                                                                                                                                                                                                                                                                                                                                                                                                                                                                                                                                                                                                                                                                                                                                                                                                                                                                                                                                                                                                                                                                                                                                                                                                                                                                                                                                                                                                                                                                         |
| 26 | TIP2 sequence | <p>atfaaaggtttatacctcccaggtacaacaaccaacttctgatcttctgtagactgttctctaaacgaacttfaaaatctgtgctg<br/> tcactcggctcgtatgctgactcagcagataatataactaacttactgctgacagggacacgagtaactcgtctatctctgc<br/> aggctcttaccggttctcctgctgacccgatcatcagcacatctaggttctcctgggtgaccgaaaggtaaatggagagc<br/> ctgtccctggttcaacgagaaacacacgtccaactcagttgctgttttacaggttcgacgtgctcgtacgtggttggagact<br/> ccgtggaggaggctttatcagaggcagctcaactcttaaagatggcacttggccttagtagaagttgaaaaagggcttttgcctcaa<br/> ctgaacagccctatgttcatcaaacgttggatgctcgaactgacacatcctatgctgtagtattggtgagcgtgtagcaaacctgaa<br/> ggcattcagtagctgtaggtgagacactggtgcttctcctcctatggtggcgaataaccagtgcttaccgcaaggttcttctc<br/> gtaagaacggtaataaaggagctggtggccatgtagcggccgatcaaaagctttagcttagggcagcagcttggcactgatcc<br/> ttatgaagatttcaagaaaactggaacactaaacatagcagtggtgttaccctggaactatgctgtagcttaacggagggcgataca<br/> ctcgtatgctgataaacattctgtgcccctgatgctaccctctgagtcattaaagacctttagcagcgtgctgtaaaagcttcatg<br/> cacttctcgaacaactgacttattgacactaaaggggtgtatactgctcctggaacatgagcatgaaattgctgtgacacgga<br/> acgttctgaaaagagctatgaattgcagacacttftgaaatfaaattggcaagaaattgacacctcaatggggaatgtcaaaatttg<br/> tatttccctaaattccataatcaagacttcaaccaagggtgaaaagaaaaagctgtaggctttatgggtgaaattcagctctctatc<br/> cagttgctcaccaaatgaatgcaaccaaatgtccttcaactctatgaaggtgtagctttaggtgaaactttagcagagggcg<br/> atfttftaaagccacttgcgaatttggcactgagaattgactaaagaaggtgcccacttctggttacttccccaaatgctgtg<br/> tfaaaatttattgctcagcatgtcacaattcagaagtaggacctgagcatagcttggcgaatacataatgaatctgcttgaaccatt<br/> ctcgtaaaggtgctgactatgcttggagctgtgttctctatgttgggtgcccataacaaggtgcttattgggttccagaaita<br/> gatctctcaggttaacgaattctgtatacagaagtatccctctccctcccccccccaactttagtggccgaagccgcttgaataa<br/> ggcgggtgctggttctctatattttccaccatattgcttggcaatgtgagggccggaaacctggccctgtctctctgacg<br/> agcattcctagggtcttcccctcgcgaaggaatgcaaggtctgtgaaatgctgaaaggaagcagttcctctgaaagcttctgaa<br/> agacaaacaacgtctgtagcacccttggcagcagcggaaacccccacctggcgacaggtgctcctcggccaaaagccacgtg<br/> tataagatacacctgcaagggcgacacccccagtgccacgtgtgagttggatgtagtggaaagatcaaatgctctcctcaag<br/> cgtattcaacaagggctgaaggatcccagaaggtaccctattgatggatctgactgggctcctgacacatgctttacatgtg<br/> tttagtcaggtfaaaaaacgttaggcccccaaccacggggacgtggtttcttcttgaagaacacgatgataatattgtgagcaa<br/> ggcgagggagataacatgcatcaaggatgctgcttcaaggtgacatgagggctcctgtaacggccacgagttcg<br/> agatcagggcgagggcgagggcccccctacgagggcaccagaccgcaagctgaaggtgaccaaggtgccccctgccc<br/> ctcgcctgggacatcctgtcccctcagttcatgtagcgtccaagcctacgtgaaagcaccggcgacatccccgactacttgaag<br/> ctgtcctccccgaggcttcaagtgggagcgtgatgaacttcgaggacggcggtggtgacctgaccagggactcctcctc<br/> gcaaggacggcagttcatcaagggtgaagctgctgcccacacacttcccctccgacggccccgaatgcagaagaagacatg<br/> ggctgggagcctcctcagcggatgtaccccgaggacggcgccctgaagggcgagatcaagcagaggtgaaatgaaagga<br/> cggcgccactacgactgaggtcaagaccactacaaggccaagaagcccgtgagctgcccggcgctacaacgtcaacat<br/> caagttgacatcactcccccaacgaggtacacacatcgtggaacagtagcaagcggcggagggccaccctaccggcg<br/> catggacgagctgataagtaattgccccagcgtcagcttctcgaatgctgctgcatggaagtcacaccttgggga<br/> acgtggtgacctacaggtgcatcaaatgtagcaaaatcacaattcaaatgcaagatcaagctatttctgtaataagcataltgac<br/> gcatacaaaactccaccacagagcctaaaggaacaaaaagaagagctgtagaaactcaagccttaccgagagacaga<br/> agaacagcaaacgtgactctctcctgctgagatttgatgatttccaaacattgcaacaatcatgagcagctgctgactcaac<br/> tcaggcctaaactcagcagaccacacaaggcagatgggctatataaacgttttctgttttctgtttacgatatagtctactctgtgca<br/> gaatgaattctcgtactacatagcacaagtagatgtagttaaacttcaatctcacatagcaaatcttaactcaggtgtgaacataggaggga<br/> ctgaaagaccacacatttaccgagccacggcggatgacgatcaggtgacagtaaacatgtagggagagctgctatattg<br/> gaaagcccctaatgtgtaaaatatttagtagtgcctatcccctgtagtttaatagcttcttaggagaatgacaaaaaaaaaaaaaaaa<br/> aaaaaaaaaaaaaaaaaaaa</p> |

**Table S2: Parameters used for simulating within-host upper and lower respiratory tract infection.** Related to Figure 1 and Figure S1. With exception of  $\rho$  and  $\psi$ , all parameters were obtained from (Ke et al., 2020), which resulted from calibration to clinical samples. Sensitivity analysis to the initial viral inoculum ( $V_1(t = 0)$ ) was varied from 1 to 100, where 100 is at the limit of detection. \*For entries where a set of nine values is listed in brackets, this corresponds to the nine individual patient simulations.

| Parameter    | Description                                                         | Value                                                                                                                                                                                                                                                             |
|--------------|---------------------------------------------------------------------|-------------------------------------------------------------------------------------------------------------------------------------------------------------------------------------------------------------------------------------------------------------------|
| $T_1(t = 0)$ | Initial target cells in URT                                         | $4 \times 10^6$ cells                                                                                                                                                                                                                                             |
| $T_2(t = 0)$ | Initial target cells in LRT                                         | $4.8 \times 10^8$ cells                                                                                                                                                                                                                                           |
| $I_1(t = 0)$ | Initial infected cells in URT                                       | 0 cells                                                                                                                                                                                                                                                           |
| $V_1(t = 0)$ | Initial virus in URT                                                | 1-100 virion swab <sup>-1</sup>                                                                                                                                                                                                                                   |
| $c$          | Virus and TIP clearance rate                                        | 10 day <sup>-1</sup>                                                                                                                                                                                                                                              |
| $k$          | Rate of progression to productive infection (1/k is eclipse period) | 4 day <sup>-1</sup>                                                                                                                                                                                                                                               |
| $\Gamma$     | Virus and TIP transport rate from URT to LRT                        | 0.001 swab ml <sup>-1</sup> day <sup>-1</sup>                                                                                                                                                                                                                     |
| $\beta_T$    | Infectivity (URT)                                                   | *[ $21.45 \times 10^{-6}$ , $1.31 \times 10^{-6}$ , $13.35 \times 10^{-6}$ , $2.4 \times 10^{-6}$ , $1.41 \times 10^{-6}$ , $6.94 \times 10^{-6}$ , $18.21 \times 10^{-6}$ , $5.12 \times 10^{-6}$ , $1.53 \times 10^{-6}$ ] swab <sup>-1</sup> day <sup>-1</sup> |
| $\delta_1$   | Death rate of infected cells (URT)                                  | *[0.86, 1.82, 1.16, 3.55, 1.42, 0.76, 0.38, 3.53, 4.06] day <sup>-1</sup>                                                                                                                                                                                         |
| $\pi_T$      | Virus production (URT)                                              | *[3.68, 15.53, 11.61, 11.53, 12.47, 5.89, 8.74, 4.5, 9.65] swab <sup>-1</sup> day <sup>-1</sup>                                                                                                                                                                   |
| $\beta_S$    | Infectivity (LRT)                                                   | *[ $0.17 \times 10^{-7}$ , $0.8 \times 10^{-7}$ , $2.63 \times 10^{-7}$ , $1.35 \times 10^{-7}$ , $1.06 \times 10^{-7}$ , $0.17 \times 10^{-7}$ , $9.19 \times 10^{-7}$ , $4.9 \times 10^{-7}$ , $0.29 \times 10^{-7}$ ] ml <sup>-1</sup> day <sup>-1</sup>       |
| $\delta_2$   | Death rate of infected cells (LRT)                                  | *[2.2, 2.18, 4.17, 1.6, 2.17, 3.33, 0.41, 2.04, 3.96] day <sup>-1</sup>                                                                                                                                                                                           |
| $\pi_S$      | Virus production (LRT)                                              | *[10.89, 2.46, 1.67, 1.7, 1.08, 10.34, 0.15, 1.64, 8.15] ml <sup>-1</sup> day <sup>-1</sup>                                                                                                                                                                       |
| $t_T$        | Target cell extension timing                                        | *[14.7, 15, 6.5, 15.7, 22, 17.3, 17.85, 8.3, 17.11] days                                                                                                                                                                                                          |

|                 |                                                                                                                                                                             |                                                                    |
|-----------------|-----------------------------------------------------------------------------------------------------------------------------------------------------------------------------|--------------------------------------------------------------------|
| $\log_{10} T_N$ | Number of new target cells that appear in LRT, log 10                                                                                                                       | *[8.21, 8.44, 7.92, 10.99, 8.21, 8.79, 9, 6.89, 9.47]              |
| $w$             | Adaptive immune response parameter                                                                                                                                          | *[0.06, 0.18, 0, 2.4, 0, 0.15, 0.22, 1.89, 0.66] day <sup>-1</sup> |
| $\rho$          | Production rate of TIP genomes relative to SARS-CoV-2 genomes in cells containing both TIP and wildtype virus                                                               | 1.5                                                                |
| $\psi$          | Production rate of SARS-CoV-2 genomes in cells containing both TIP and wildtype virus, compared to the production rate of SARS-CoV-2 genomes containing only wildtype virus | 0.02                                                               |

**Table S3. Parameters used for within-host model cross-validation.** Related to Figure 1 and Figure S1G.

| Patient ID   | $\gamma$ | $\beta$               | $\delta$ | $V_0$ |
|--------------|----------|-----------------------|----------|-------|
| Singapore 2  | 3.998    | $6.64 \times 10^{-6}$ | 0.71     | 6605  |
| Singapore 3  | 3.999    | $1.26 \times 10^{-6}$ | 0.43     | 6380  |
| Singapore 4  | 3.999    | $5.81 \times 10^{-6}$ | 0.72     | 6514  |
| Singapore 6  | 3.999    | $3.08 \times 10^{-6}$ | 0.47     | 6498  |
| Singapore 8  | 3.997    | $1.96 \times 10^{-5}$ | 0.36     | 6850  |
| Singapore 9  | 3.999    | $1.56 \times 10^{-5}$ | 0.28     | 6558  |
| Singapore 11 | 3.999    | $8.46 \times 10^{-6}$ | 1.38     | 6860  |
| Singapore 12 | 3.999    | $7.77 \times 10^{-6}$ | 0.78     | 6506  |
| Singapore 14 | 3.997    | $3.52 \times 10^{-7}$ | 1.03     | 5337  |
| Singapore 16 | 3.999    | $4.88 \times 10^{-6}$ | 0.54     | 6489  |
| Singapore 17 | 3.998    | $1.32 \times 10^{-6}$ | 1.01     | 5891  |
| Singapore 18 | 3.999    | $5.80 \times 10^{-6}$ | 0.38     | 6537  |
| China C      | 4.002    | $7.95 \times 10^{-6}$ | 1.29     | 6596  |
| China D      | 3.999    | $1.69 \times 10^{-6}$ | 0.76     | 6752  |
| China E      | 3.999    | $5.87 \times 10^{-6}$ | 0.84     | 6517  |
| China H      | 3.999    | $1.05 \times 10^{-5}$ | 1.45     | 7059  |
| China I      | 3.999    | $6.15 \times 10^{-7}$ | 0.45     | 6251  |
| China L      | 3.999    | $1.73 \times 10^{-6}$ | 0.77     | 6178  |
| China O      | 3.999    | $4.57 \times 10^{-5}$ | 1.9      | 8541  |
| China P      | 3.997    | $1.02 \times 10^{-5}$ | 1.03     | 6808  |
| Germany 1    | 3.999    | $7.28 \times 10^{-6}$ | 0.98     | 6610  |
| Germany 2    | 3.999    | $2.88 \times 10^{-6}$ | 1.51     | 6262  |
| Germany 3    | 3.999    | $1.11 \times 10^{-5}$ | 1.32     | 5894  |
| Germany 4    | 3.996    | $6.65 \times 10^{-6}$ | 1.6      | 6678  |
| Germany 7    | 3.999    | $3.08 \times 10^{-6}$ | 1.11     | 6259  |
| Germany 8    | 3.999    | $3.29 \times 10^{-6}$ | 1.08     | 6375  |
| Germany 10   | 3.999    | $2.67 \times 10^{-6}$ | 0.61     | 6268  |
| Germany 14   | 3.996    | $8.91 \times 10^{-6}$ | 1.61     | 6350  |
| Korea 13     | 3.999    | $9.67 \times 10^{-6}$ | 1.15     | 7674  |
| Korea 15     | 3.999    | $1.44 \times 10^{-5}$ | 1.16     | 5802  |
